# Supplementary material for: Long-term in vivo polychlorinated biphenyl 126 exposure induces oxidative stress and alters proteomic profile on islets of Langerhans
Source: PubMed Central journal article supplement (PMC4904407; doi:10.1038/srep27882), 2016-06-13
Supplement: srep27882-s1.pdf [file srep27882-s1.pdf]

**Long-term *in vivo* polychlorinated biphenyl 126 exposure induces oxidative stress and alters proteomic profile on islets of Langerhans**

Rodrigo Azevedo Loiola<sup>1</sup>; Fabyana Maria dos Anjos<sup>1</sup>; Ana Lúcia Borges Shimada<sup>1</sup>; Wesley Soares Cruz<sup>1</sup>; Carine Cristiane Drewes<sup>1</sup>; Stephen Fernandes de Paula Rodrigues<sup>1</sup>; Karina Helena Morais Cardozo<sup>2</sup>; Valdemir Melechco Carvalho<sup>2</sup>; Ernani Pinto<sup>1</sup>; Sandra Helena Poliselli Farsky<sup>1\*</sup>

<sup>1</sup>Department of Clinical and Toxicological Analyses, Faculty of Pharmaceutical Sciences, University of São Paulo, São Paulo, Brazil.

<sup>2</sup>Fleury Group, São Paulo, Brazil.

**\*Address correspondent author:** Sandra Helena Poliselli Farsky, Av. Prof. Lineu Prestes 580, Building 13B, Cidade Universitária. São Paulo, SP, Brazil. Postal Code 05508-900. Telephone: +55-11-3091-1193; Fax number: +55-11-3815-6593; e-mail: [sfarsky@usp.br](mailto:sfarsky@usp.br)

## **1. Methods**

### **1.1 Protocol of *in vivo* PCB180 exposure**

During 15 days, once a day, the animals were anaesthetized with ketamine/xylazine solution (80:8 mg/kg respectively, intraperitoneally— i.p.) and exposed to PCB180 10 µg/Kg (Sigma-Aldrich, St. Louis, MO, USA) of body weight by intranasal instillation. Control animals received the equivalent volume of vehicle (saline solution containing 0.5% of dimethyl sulfoxide—DMSO). During exposure, body weight, food intake and water consumption were measured at every day.

### **1.2 Morphometry of the endocrine pancreas**

Animals were perfused through the heart with fixation solution (PBS containing paraformaldehyde 4%— PFA 4%). The pancreas were excised and fixed (PFA 4%, 6 hr), followed by immersion in a cryoprotective solution (PBS containing sucrose 30%). Frozen pancreas sections (10 µm) were cut on a cryostat and stained with hematoxylin-eosin for morphometric analysis. Images were obtained by a microscopy Axiovert 100M (Carl Zeiss, Germany), and islets area (µm<sup>2</sup>) was determined using the software AxioVision Release 4.8 (Carl Zeiss, Germany).

### **1.3 Cell viability and cell cycle**

Islets were dissociated by incubation with trypsin 0.1% (5 min at 37°C) before performing experiments. For evaluation of viability, cells were incubated with anti-annexin-V FITC-conjugated (1:100, 20 min, at 4°C) and propidium iodide (PI, 50 µg/mL) immediately before analysis. For cell cycle, cells were incubated with 300 µL of fluorescent hypotonic solution [phosphate buffered solution (PBS), 2% fetal bovine serum (FBS), 0.05% Triton-X 100, 0.1% sodium citrate] containing RNase A (15 mg/mL) and PI (50 mg/mL) for 30 min at room temperature. Data from 10.000 cell events were acquired in a FACSCanto II flow cytometer (BD, CA, USA) and analysed using software (FlowJo, BD, CA, USA).

## 2. Results

Figure S1

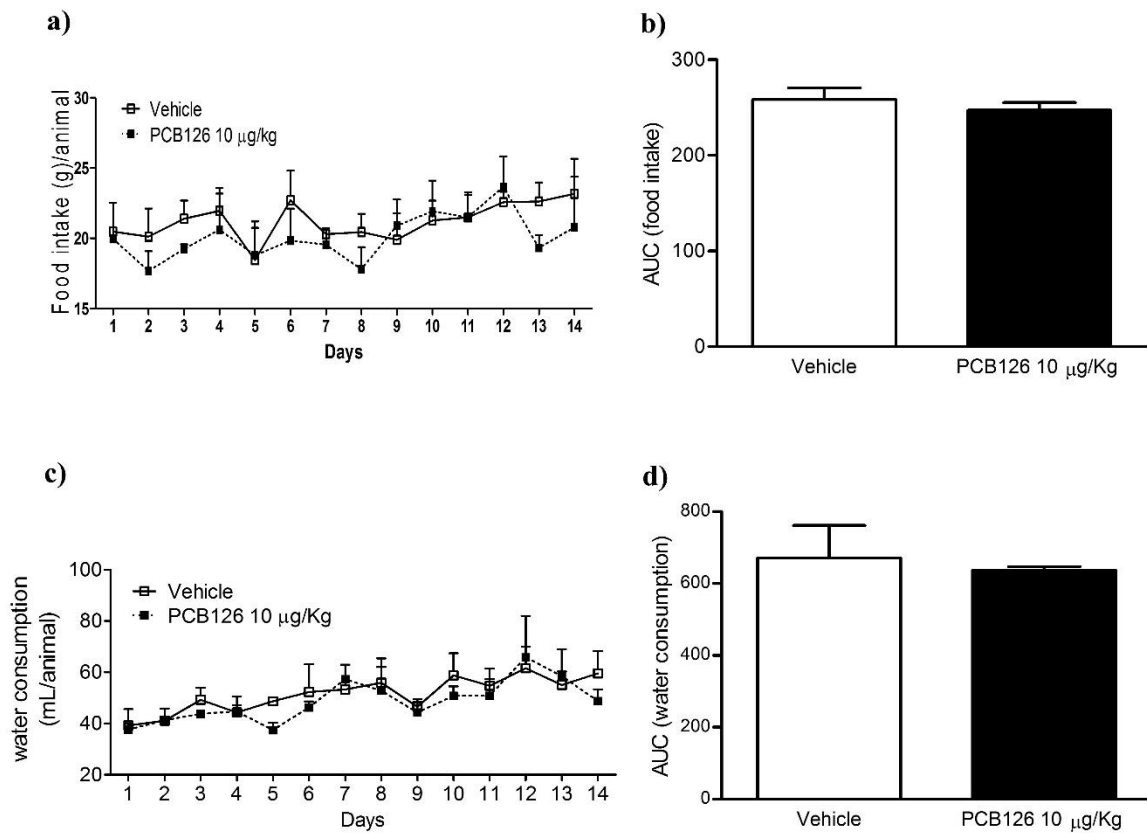

**Figure S1:** Effect of *in vivo* PCB126 exposure on food intake and water consumption. [A] Lines graph showing diary food intake (g/animal) and [B] bars graph showing AUC of total food intake (g) during PCB126 (10 µg/kg of body weight) or vehicle exposure. [C] Lines graph showing daily water consumption (mL/animal) and [B] bars graph showing AUC of total water consumption (mL) during PCB126 or vehicle exposure. Data were analyzed by two-way ANOVA [A and C] or one-way ANOVA [B and D].

**Figure S2**

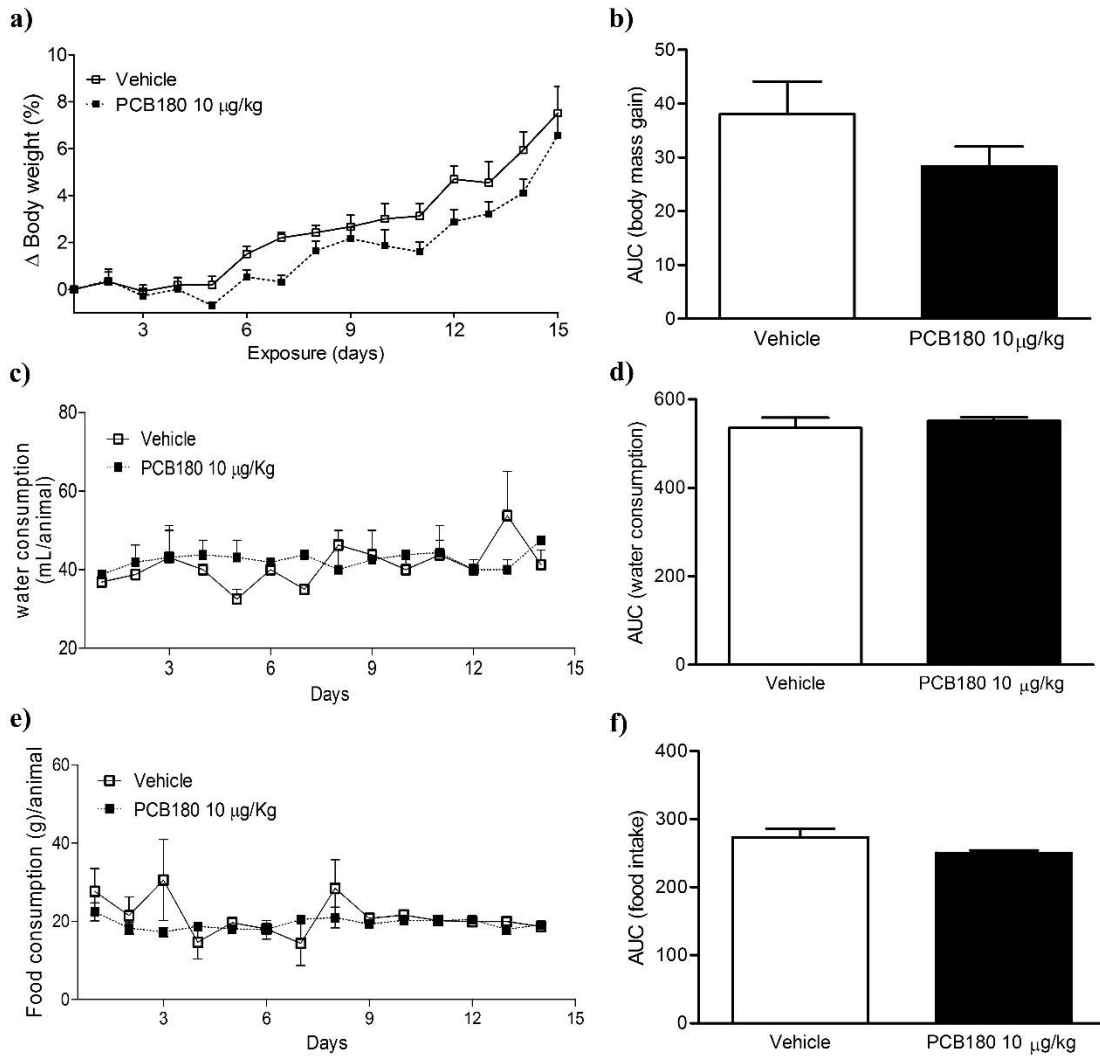

**Figure S2:** Effect of *in vivo* PCB180 exposure on weight gain, food intake, and water consumption. [A] Lines graph showing weight gain (% in relationship to the beginning of exposure) and [B] bars graph showing area under the curve (AUC) of body weight gain during PCB180 (10  $\mu$ g/kg of BW) exposure. [C] Lines graph showing daily food intake (g/animal) and [D] bars graph showing area under the curve (AUC) of total food intake (g) during PCB180 (10  $\mu$ g/kg of BW) or vehicle exposure. [E] Lines graph showing daily water consumption (mL/animal) and [F] bars graph showing area under the curve (AUC) of total water consumption (mL) during PCB180 or vehicle exposure. Data were analyzed by two-way ANOVA [A, C, and E] or student's *t*-test [B, D, and F].

**Figure S3**

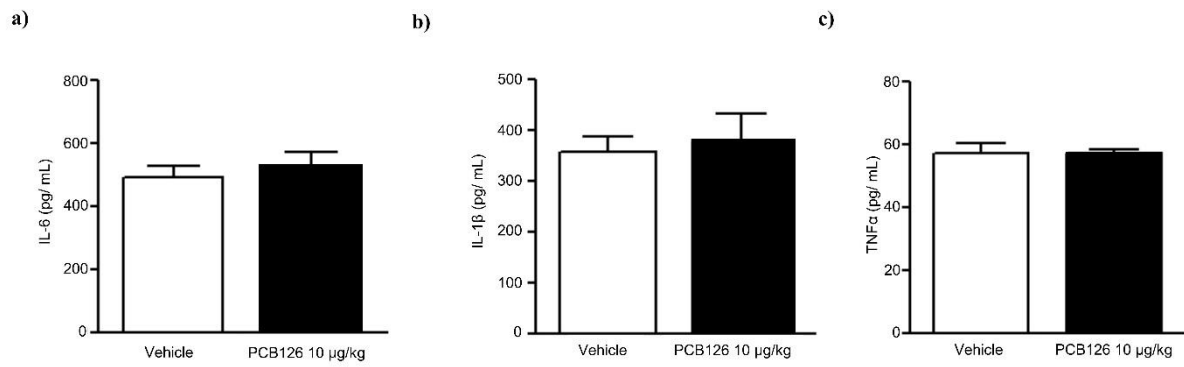

**Figure S3:** Effect of *in vivo* PCB126 exposure on plasmatic cytokines. Bars graph showing levels (pg/mL) of IL-1β [A], TNF-α [B], and IL-6 [C] on plasma from rats exposed to vehicle or PCB126 (10 μg/kg of body weight). Data were analyzed by student's *t*-test.

**Figure S4**

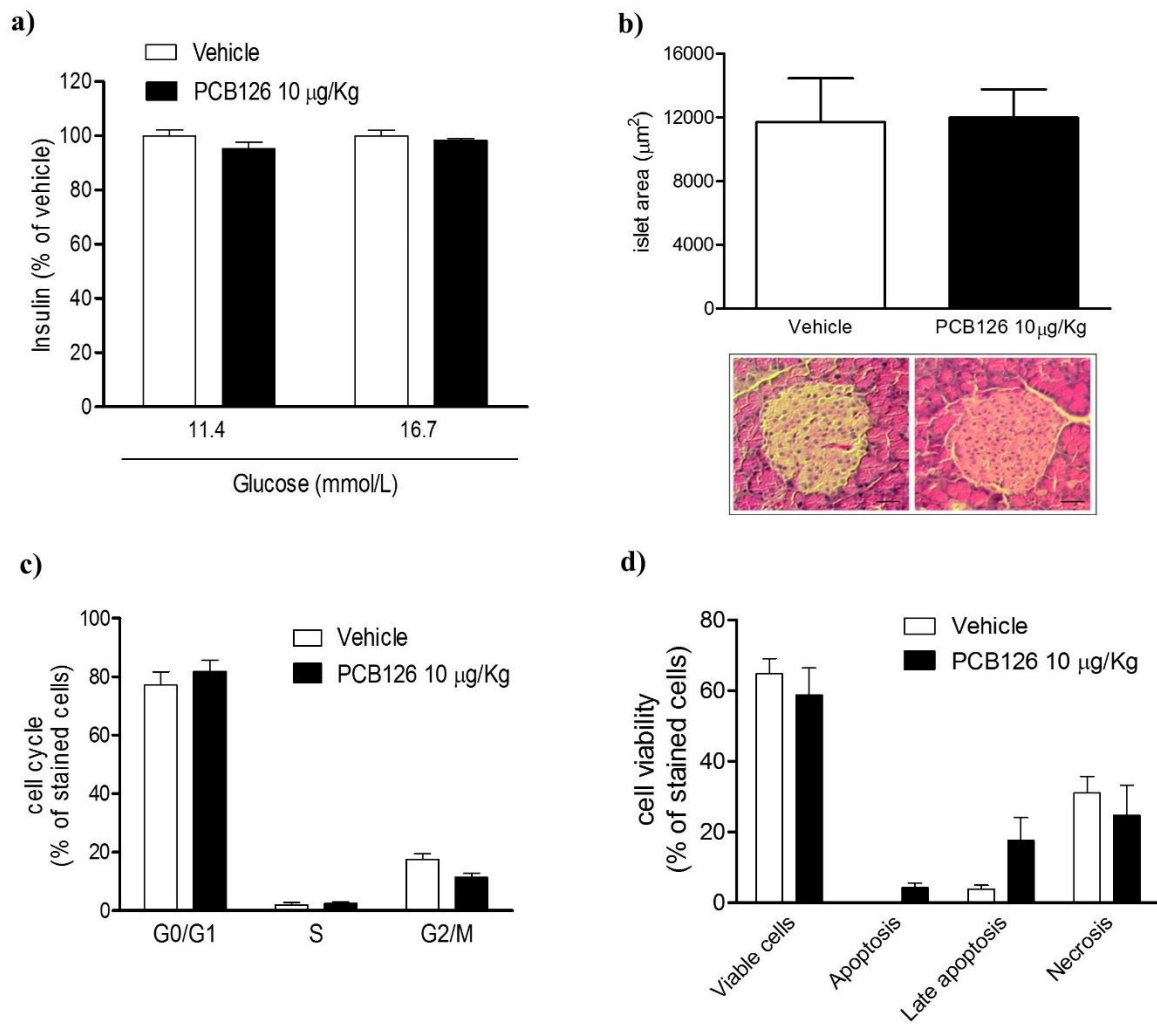

**Figure S4:** Effect of *in vivo* PCB126 exposure on function, morphology, and viability of islets of Langerhans. [A] Insulin secretion (% in relationship to vehicle group) by islets cultured at physiological (11.4 mM) or high glucose levels (16.7 mM). [B] Bars graph and representative image of islet morphology. Determination of cell cycle [C] and cell viability [D] of islets. Data were analyzed by two-way ANOVA [A, C-E] or student's *t*-test [B].
